# Supplementary material
Source: bioRxiv or medRxiv preprint supplement (https://www.biorxiv.org/highwire/filestream/66049/field_highwire_adjunct_files/5/216754-5.pdf)

# Supplementary Figure 5

## Breast cancer

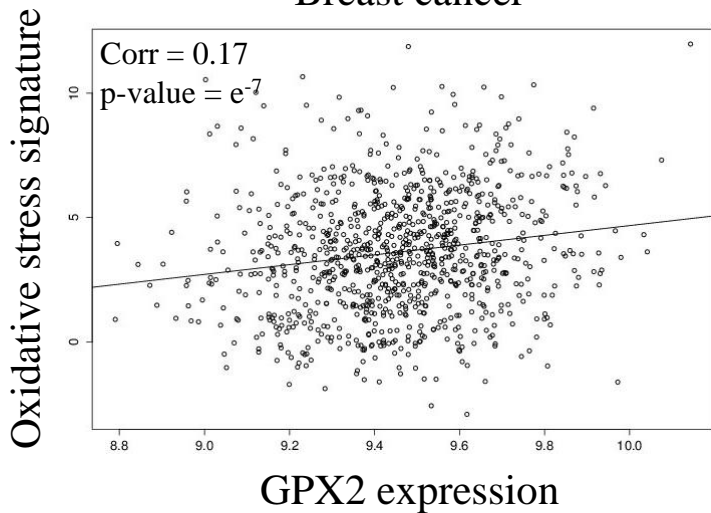

## Colorectal cancer

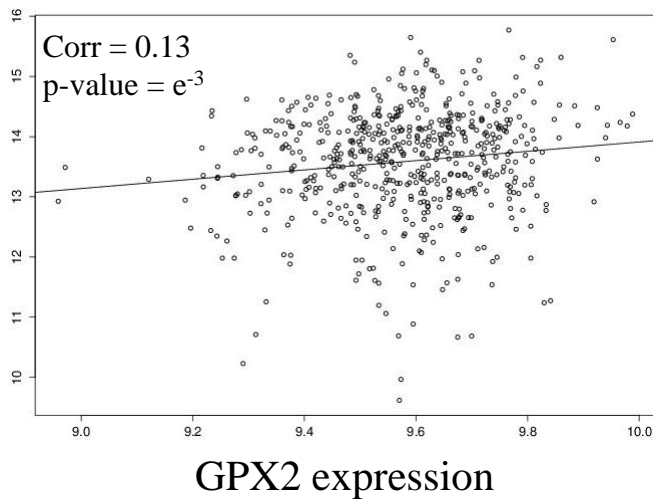

## Head and Neck cancer

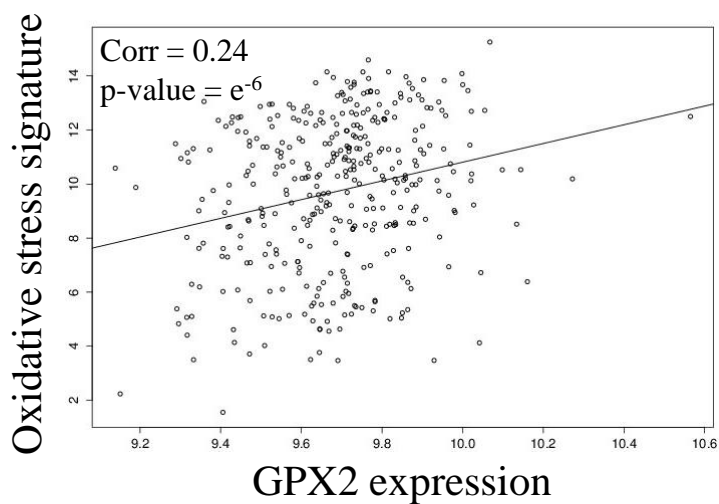

## Lung adenocarcinoma

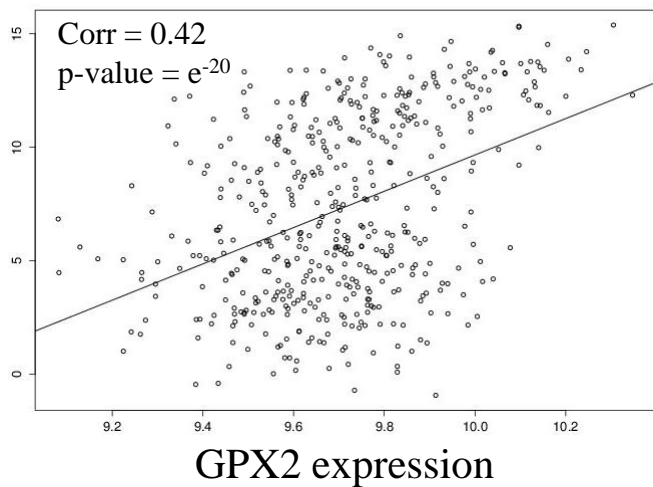

## Lung squamous cell carcinoma

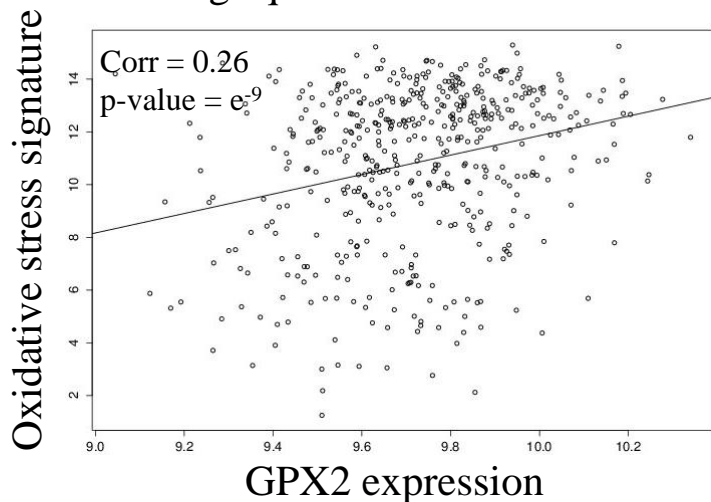

## Endometrial cancer

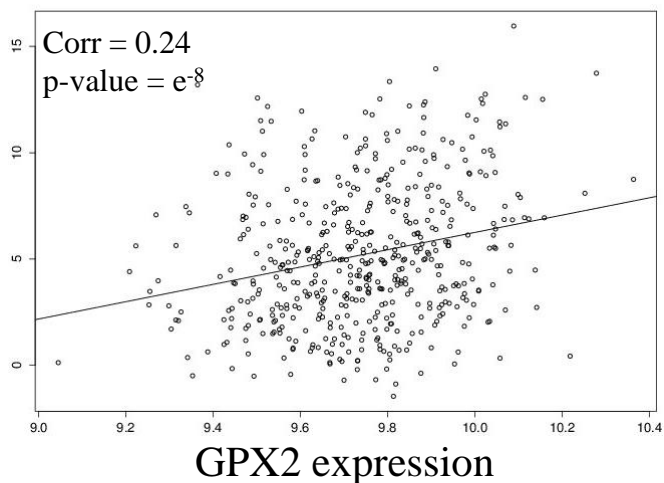

Supplement: Supplementary file [file 216754-5.pdf]
